# Supplementary material for: Serum Neurofilament Light Chain and Glial Fibrillary Acidic Protein as Potential Diagnostic Biomarkers in Autism Spectrum Disorders: A Preliminary Study
Source: MDPI journal article supplement (doi:10.3390/ijms24033057), 2023-02-03
Supplement: s1 [file s1]

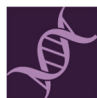

Supplementary Materials

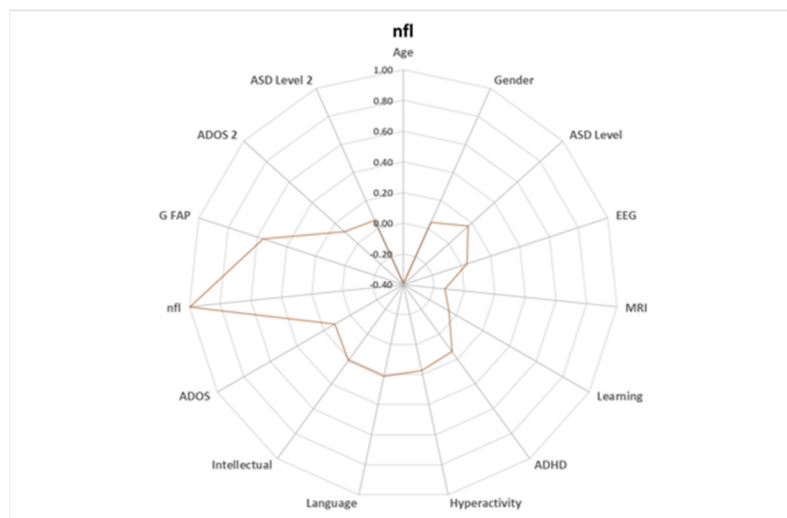

**Figure S1.** Star plot of the correlation test results of Nfl levels with clinical features in ASD sample.

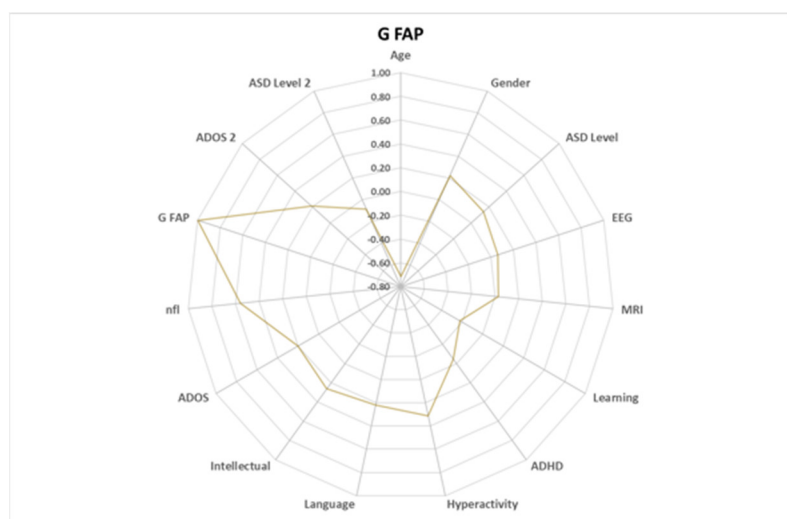

**Figure S2.** Star plot of the correlation test results of GFAP levels with clinical features in ASD sample.
